# Supplementary material for: Tetrahydrobiopterin responsiveness in phenylketonuria: prediction with the 48-hour loading test and genotype
Source: PubMed Central journal article supplement (PMC3711849; doi:10.1186/1750-1172-8-103), 2013-07-10
Supplement: 1750-1172-8-103-S1.pdf [file 1750-1172-8-103-S1.pdf]

**Supplementary Table: Overview of genotypes, results of the 48-hour BH4 loading test and the BH4 extension phase**

| Allele 1       | Allele 2        | Phe load <sup>†</sup> | T=0             | Max Phe ↓ (%) | Extension phase |              |
|----------------|-----------------|-----------------------|-----------------|---------------|-----------------|--------------|
| IVS2+5G>C‡§    | c.168+5G>C      | p.W187*‡              | c.561G>A        | No            | 741 4           | No           |
| IVS2+5G>C‡§    | c.168+5G>C      | p.W187*‡              | c.561G>A        | No            | 326 17          | No           |
| IVS2+5G>C‡     | c.168+5G>C      | p.R243*‡              | c.727C>T        | No            | 1049 25         | No           |
| IVS2+5G>C‡     | c.168+5G>C      | p.R261Q¶              | c.782G>A        | No            | 491 15          | No           |
| IVS5-21del177‡ | c.510-21_665del | p.G272*‡              | c.814G>T        | No            | 855 5           | No           |
| IVS7+1G>A‡     | c.842+1G>A      | p.R243Q‡              | c.728G>A        | Yes           | 626 5           | No           |
| IVS7+5G>A‡     | c.842+5G>A      | p.R158Q¶              | c.473G>A        | Yes           | 896 -1          | No           |
| IVS7+5G>A‡     | c.842+5G>A      | p.Y414C               | c.1241A>G       | No            | 503 36          | Yes positive |
| IVS7-5T>C‡     | c.843-5T>C      | p.P281L‡              | c.842C>T        | No            | 949 22          | No           |
| IVS10-11G>A‡   | c.1066-11G>A    | IVS10-11G>A‡          | c.1066-11G>A    | No            | 1224 22         | No           |
| IVS10-11G>A‡   | c.1066-11G>A    | IVS10-11G>A‡          | c.1066-11G>A    | Yes           | 550 14          | No           |
| IVS10-11G>A‡   | c.1066-11G>A    | IVS10-11G>A‡          | c.1066-11G>A    | No            | 705 3           | No           |
| IVS10-11G>A‡§  | c.1066-11G>A    | p.L48S                | c.143T>C        | Yes           | 478 56          | No           |
| IVS10-11G>A‡§  | c.1066-11G>A    | p.L48S                | c.143T>C        | No            | 845 27          | No           |
| IVS10-11G>A‡§  | c.1066-11G>A    | p.L48S                | c.143T>C        | Yes           | 459 48          | No           |
| IVS10-11G>A‡   | c.1066-11G>A    | p.D222G¶              | c.665A>G        | Yes           | 936 23          | No           |
| IVS12+1G>A‡    | c.1315+1G>A     | IVS12+1G>A‡           | c.1315+1G>A     | No            | 769 9           | No           |
| IVS12+1G>A‡    | c.1315+1G>A     | p.S16* ‡              | c.47_48delICT   | Yes           | 715 -4          | No           |
| IVS12+1G>A‡    | c.1315+1G>A     | p.S16* ‡              | c.47_48delICT   | No            | 451 12          | No           |
| IVS12+1G>A‡    | c.1315+1G>A     | p.S16* ‡              | c.47_48delICT   | No            | 599 0           | No           |
| IVS12+1G>A‡    | c.1315+1G>A     | p.L48S                | c.143T>C        | Yes           | 304 69          | Yes positive |
| IVS12+1G>A‡    | c.1315+1G>A     | p.I65T                | c.194T>C        | Yes           | 587 60          | No           |
| IVS12+1G>A‡§   | c.1315+1G>A     | p.II74N¶              | c.521T>A        | Yes           | 692 35          | Yes negative |
| IVS12+1G>A‡§   | c.1315+1G>A     | p.II74N¶              | c.521T>A        | Yes           | 663 17          | No           |
| IVS12+1G>A‡    | c.1315+1G>A     | p.W187*‡              | c.561G>A        | No            | 514 7           | No           |
| IVS12+1G>A‡§   | c.1315+1G>A     | p.P211T‡‡             | c.631C>A        | Yes           | 367 81          | Yes positive |
| IVS12+1G>A‡    | c.1315+1G>A     | p.R241C               | c.721C>T        | Yes           | 464 45          | Yes positive |
| IVS12+1G>A‡    | c.1315+1G>A     | p.R243*‡              | c.727C>T        | Yes           | 588 21          | No           |
| IVS12+1G>A‡    | c.1315+1G>A     | p.R261P¶              | c.782G>C        | Yes           | 591 -4          | No           |
| IVS12+1G>A‡    | c.1315+1G>A     | p.R261Q¶              | c.782G>A        | No            | 852 -1          | No           |
| IVS12+1G>A‡    | c.1315+1G>A     | p.R261Q¶              | c.782G>A        | No            | 408 16          | No           |
| IVS12+1G>A‡    | c.1315+1G>A     | p.R261Q¶              | c.782G>A        | Yes           | 709 22          | No           |
| IVS12+1G>A‡    | c.1315+1G>A     | p.R261Q¶              | c.782G>A        | No            | 577 21          | No           |
| IVS12+1G>A‡    | c.1315+1G>A     | p.Y277D¶              | c.829T>G        | No            | 557 -18         | No           |
| IVS12+1G>A‡§   | c.1315+1G>A     | p.P281L‡              | c.842C>T        | Yes           | 950 22          | No           |
| IVS12+1G>A‡§   | c.1315+1G>A     | p.P281L‡              | c.842C>T        | No            | 650 19          | No           |
| IVS12+1G>A‡    | c.1315+1G>A     | p.P281L‡              | c.842C>T        | Yes           | 469 7           | No           |
| IVS12+1G>A‡    | c.1315+1G>A     | p.A300S               | c.898G>T        | Yes           | 321 62          | Yes positive |
| IVS12+1G>A‡    | c.1315+1G>A     | p.L348V               | c.1042C>G       | Yes           | 593 33          | Yes positive |
| IVS12+1G>A‡    | c.1315+1G>A     | p.L367Pfs*27‡         | c.1099_1100insC | Yes           | 397 -5          | No           |
| IVS12+1G>A‡    | c.1315+1G>A     | p.L367Pfs*27‡         | c.1099_1100insC | No            | 934 10          | No           |
| IVS12+1G>A‡    | c.1315+1G>A     | p.A403V               | c.1208C>T       | Yes           | 314 85          | Yes positive |
| IVS12+1G>A‡    | c.1315+1G>A     | p.R408W‡              | c.1222C>T       | No            | 890 -1          | No           |
| IVS12+1G>A‡    | c.1315+1G>A     | p.Y414C               | c.1241A>G       | No            | 896 63          | Yes positive |
| IVS12+1G>A‡    | c.1315+1G>A     | p.Y414C               | c.1241A>G       | Yes           | 681 72          | Yes positive |
| IVS12+1G>A‡    | c.1315+1G>A     | p.Y414C               | c.1241A>G       | Yes           | 576 83          | Yes positive |
| IVS12+1G>A‡§   | c.1315+1G>A     | p.Y414C               | c.1241A>G       | No            | 535 56          | Yes positive |
| IVS12+1G>A‡§   | c.1315+1G>A     | p.Y414C               | c.1241A>G       | No            | 390 45          | Yes positive |

| Allele 1                       | Allele 2        | Phe load <sup>†</sup>        | T=0             | Max Phe ↓ (%) | Extension phase |              |
|--------------------------------|-----------------|------------------------------|-----------------|---------------|-----------------|--------------|
| (Continued from previous page) |                 |                              |                 |               |                 |              |
| IVS12+1G>A <sup>‡</sup>        | c.1315+1G>A     | p.Y414C                      | c.1241A>G       | No            | 465 38          | Yes positive |
| p.L48S                         | c.143T>C        | p.R158Q                      | c.473G>A        | Yes           | 316 52          | No           |
| p.L48S  §                      | c.143T>C        | p.R241C                      | c.721C>T        | Yes           | 365 49          | Yes positive |
| p.L48S  §                      | c.143T>C        | p.R241C                      | c.721C>T        | Yes           | 532 59          | Yes positive |
| p.L48S                         | c.143T>C        | p.R261Q                      | c.782G>A        | No            | 530 28          | No           |
| p.L48S                         | c.143T>C        | p.P281L <sup>‡</sup>         | c.842C>T        | Yes           | 525 63          | Yes positive |
| p.L48S                         | c.143T>C        | p.R408W <sup>‡</sup>         | c.1222C>T       | No            | 815 36          | Yes positive |
| p.F55Lfs*6 <sup>‡</sup>        | c.165delT       | p.P281L <sup>‡</sup>         | c.842C>T        | No            | 411 -7          | No           |
| p.I65T                         | c.194T>C        | p.L311P <sup>‡</sup>         | c.932T>C        | Yes           | 530 33          | Yes negative |
| p.I94del <sup>‡</sup>          | c.283_285delATC | p.P314H <sup>‡‡</sup>        | c.941C>A        | Yes           | 436 65          | Yes positive |
| p.I94del <sup>‡</sup>          | c.283_285delATC | p.Y414C                      | c.1241A>G       | No            | 521 72          | Yes positive |
| p.A104D <sup>††</sup>          | c.311C>A        | p.A104D <sup>††</sup>        | c.311C>A        | Yes           | 660 57          | Yes positive |
| p.A104D <sup>††</sup>          | c.311C>A        | p.R158Q                      | c.473G>A        | No            | 646 31          | Yes positive |
| p.A104D <sup>††</sup>          | c.311C>A        | p.R241C                      | c.721C>T        | Yes           | 574 42          | No           |
| p.A104D <sup>††</sup>          | c.311C>A        | p.R408W <sup>‡</sup>         | c.1222C>T       | Yes           | 486 34          | Yes positive |
| p.R111* <sup>‡</sup>           | c.331C>T        | p.R408W <sup>‡</sup>         | c.1222C>T       | No            | 766 14          | No           |
| p.R158Q                        | c.473G>A        | p.R158Q                      | c.473G>A        | No            | 633 34          | Yes negative |
| p.R158Q                        | c.473G>A        | p.R158Q                      | c.473G>A        | No            | 535 5           | No           |
| p.R158Q                        | c.473G>A        | p.V190A                      | c.569T>C        | No            | 327 53          | Yes positive |
| p.R158Q                        | c.473G>A        | p.V190A                      | c.569T>C        | Yes           | 511 52          | Yes positive |
| p.R158Q                        | c.473G>A        | p.R243* <sup>‡</sup>         | c.727C>T        | No            | 323 4           | No           |
| p.R158Q                        | c.473G>A        | p.R261P                      | c.782G>C        | No            | 1348 6          | No           |
| p.R158Q                        | c.473G>A        | p.Y277D                      | c.829T>G        | Yes           | 257 40          | Yes negative |
| p.R158Q                        | c.473G>A        | p.R408W <sup>‡</sup>         | c.1222C>T       | Yes           | 655 -1          | No           |
| p.R158Q                        | c.473G>A        | p.Y414C                      | c.1241A>G       | No            | 366 68          | Yes positive |
| p.R158Q                        | c.473G>A        | p.Y414C                      | c.1241A>G       | Yes           | 362 74          | Yes positive |
| p.I174N  §                     | c.521T>A        | p.P211T <sup>††</sup>        | c.631C>A        | Yes           | 360 67          | Yes positive |
| p.I174T                        | c.521T>C        | p.F299C <sup>‡</sup>         | c.896T>G        | No            | 1049 -24        | No           |
| p.E178G                        | c.533A>G        | p.Y343C                      | c.1028A>G       | Yes           | 353 64          | Yes positive |
| p.W187* <sup>‡</sup>           | c.561G>A        | p.W187* <sup>‡</sup>         | c.561G>A        | No            | 505 17          | No           |
| p.W187* <sup>‡</sup>           | c.561G>A        | p.T193I <sup>††</sup>        | c.578C>T        | No            | 365 62          | Yes positive |
| p.W187* <sup>‡</sup>           | c.561G>A        | p.L367Pfs*27 <sup>‡</sup>    | c.1099_1100insC | Yes           | 689 -2          | No           |
| p.V190A                        | c.569T>C        | p.S231F <sup>‡</sup>         | c.692C>T        | Yes           | 448 41          | Yes positive |
| p.V190A                        | c.569T>C        | p.L311P <sup>‡</sup>         | c.932T>C        | Yes           | 592 76          | No           |
| p.L197Lfs <sup>‡</sup>         | c.590_611del    | p.D415N                      | c.1243G>A       | Yes           | 302 73          | Yes positive |
| p.C203Y                        | c.608G>A        | p.L348V                      | c.1042C>G       | Yes           | 486 25          | No           |
| p.P211Hfs <sup>‡</sup>         | c.632delC       | p.S231P <sup>‡</sup>         | c.691T>C        | Yes           | 474 -8          | No           |
| <b>p.T238A</b> <sup>††</sup>   | c.712A>G        | p.P281L <sup>‡</sup>         | c.842C>T        | Yes           | 549 59          | Yes positive |
| p.R243* <sup>‡</sup>           | c.727C>T        | p.R261Q                      | c.782G>A        | No            | 620 39          | Yes negative |
| p.R243* <sup>‡</sup> §         | c.727C>T        | p.S349P <sup>‡</sup>         | c.1045T>C       | Yes           | 719 37          | No           |
| p.R243* <sup>‡</sup> §         | c.727C>T        | p.S349P <sup>‡</sup>         | c.1045T>C       | Yes           | 693 22          | No           |
| p.R243* <sup>‡</sup> §         | c.727C>T        | p.S349P <sup>‡</sup>         | c.1045T>C       | Yes           | 352 31          | No           |
| p.R243* <sup>‡</sup> §         | c.727C>T        | p.A403V                      | c.1208C>T       | Yes           | 515 87          | Yes positive |
| p.R243* <sup>‡</sup> §         | c.727C>T        | p.A403V                      | c.1208C>T       | Yes           | 420 74          | No           |
| p.R243X <sup>‡</sup>           | c.727C>T        | p.Y414C                      | c.1241A>G       | Yes           | 634 49          | Yes positive |
| p.R243* <sup>‡</sup>           | c.727C>T        | <b>p.E440</b> * <sup>‡</sup> | c.1318G>T       | No            | 560 21          | No           |
| p.R252W <sup>‡</sup>           | c.754C>T        | p.P281L <sup>‡</sup>         | c.842C>T        | No            | 882 -2          | No           |
| p.R261P                        | c.782G>C        | p.Y414C                      | c.1241A>G       | No            | 572 30          | Yes positive |

| Allele 1                                                                                                                                                                                                                                                          |                 | Allele 2       |            | Phe load <sup>†</sup> | T=0  | Max Phe ↓ (%) | Extension phase |
|-------------------------------------------------------------------------------------------------------------------------------------------------------------------------------------------------------------------------------------------------------------------|-----------------|----------------|------------|-----------------------|------|---------------|-----------------|
| (Continued from previous page)                                                                                                                                                                                                                                    |                 |                |            |                       |      |               |                 |
| p.R261Q¶§                                                                                                                                                                                                                                                         | c.782G>A        | p.R261Q¶       | c.782G>A   | No                    | 758  | 25            | No              |
| p.R261Q¶§                                                                                                                                                                                                                                                         | c.782G>A        | p.R261Q¶       | c.782G>A   | Yes                   | 510  | 7             | No              |
| p.R261Q¶                                                                                                                                                                                                                                                          | c.782G>A        | p.E280K‡       | c.838G>A   | Yes                   | 654  | 25            | No              |
| p.R261Q¶                                                                                                                                                                                                                                                          | c.782G>A        | p.E280K‡       | c.838G>A   | No                    | 1476 | 25            | No              |
| p.R261Q¶                                                                                                                                                                                                                                                          | c.782G>A        | p.P281L‡       | c.842C>T   | No                    | 1237 | 29            | No              |
| p.R261Q¶                                                                                                                                                                                                                                                          | c.782G>A        | p.P281L‡       | c.842C>T   | Yes                   | 488  | 79            | Yes positive    |
| p.G272*‡                                                                                                                                                                                                                                                          | c.814G>T        | p.Y414C        | c.1241A>G  | Yes                   | 462  | 84            | Yes positive    |
| p.Y277D¶§                                                                                                                                                                                                                                                         | c.829T>G        | p.P314H††      | c.941C>A   | Yes                   | 206  | 33            | Yes positive    |
| p.Y277D¶§                                                                                                                                                                                                                                                         | c.829T>G        | p.P314H††      | c.941C>A   | Yes                   | 213  | 68            | No              |
| p.E280K‡                                                                                                                                                                                                                                                          | c.838G>A        | p.Y414C        | c.1241A>G  | Yes                   | 481  | 73            | Yes positive    |
| p.P281L‡§                                                                                                                                                                                                                                                         | c.842C>T        | p.P281L‡       | c.842C>T   | No                    | 581  | -6            | No              |
| p.P281L‡§                                                                                                                                                                                                                                                         | c.842C>T        | p.P281L‡       | c.842C>T   | No                    | 1317 | 4             | No              |
| p.P281L‡                                                                                                                                                                                                                                                          | c.842C>T        | p.P281L‡       | c.842C>T   | No                    | 1020 | 15            | No              |
| p.P281L‡                                                                                                                                                                                                                                                          | c.842C>T        | p.A300S        | c.898G>T   | Yes                   | 480  | 66            | Yes positive    |
| p.P281L‡                                                                                                                                                                                                                                                          | c.842C>T        | p.Y356*‡       | c.1068C>G  | Yes                   | 1181 | 38            | Yes negative    |
| p.P281L‡§                                                                                                                                                                                                                                                         | c.842C>T        | p.R413P‡       | c.1238G>C  | No                    | 921  | 9             | No              |
| p.P281L‡§                                                                                                                                                                                                                                                         | c.842C>T        | p.R413P‡       | c.1238G>C  | No                    | 640  | -1            | No              |
| p.A300S                                                                                                                                                                                                                                                           | c.898G>T        | p.R408W‡       | c.1222C>T  | Yes                   | 260  | 42            | Yes positive    |
| p.G352Vfs*48 ‡                                                                                                                                                                                                                                                    | c.1055delG      | p.G352Vfs*48 ‡ | c.1055delG | No                    | 570  | 60            | Yes negative    |
| p.K363Nfs*37 ‡§                                                                                                                                                                                                                                                   | c.1089delG      | p.K363Nfs*37 ‡ | c.1089delG | No                    | 817  | 3             | No              |
| p.K363Nfs*37 ‡§                                                                                                                                                                                                                                                   | c.1089delG      | p.K363Nfs*37 ‡ | c.1089delG | Yes                   | 576  | 19            | No              |
| p.L367Pfs*27 ‡                                                                                                                                                                                                                                                    | c.1099_1100insC | p.Y414C        | c.1241A>G  | No                    | 458  | 78            | Yes positive    |
| p.R408Q††                                                                                                                                                                                                                                                         | c.1223G>A       | p.R408Q††      | c.1223G>A  | Yes                   | 315  | 36            | Yes positive    |
| p.Y414C                                                                                                                                                                                                                                                           | c.1241A>G       | p.Y414C        | c.1241A>G  | Yes                   | 339  | 49            | Yes positive    |
| † Phe supplementation, ‡ Putative null mutation, § siblings/family, ¶ unclassified mutation,    mutation associated with long-term BH4 responsiveness, †† mutation in this study newly associated with long-term BH4 responsiveness, novel mutations are in bold. |                 |                |            |                       |      |               |                 |
